# Supplementary material for: Breaking Ban: Belgium’s Ineffective Gambling Law Regulation of Video Game Loot Boxes
Source: Oxford University Press journal article supplement (doi:10.1525/collabra.57641), 2023-01-01
Supplement: collabra_2023_9_1_57641_123417.docx [file collabra_2023_9_1_57641_123417.docx]

**Peer Review and Communication History**

**MS Title**: Breaking Ban: Belgium’s Ineffective Gambling Law Regulation of Video Game Loot Boxes

**Author Names**: Leon Y. Xiao

**Submitted:** Dec 6, 2022

Please find attached a stage 2 registered report that has been recommended after peer-review at *Peer* *Community In Registered Reports*: <https://rr.peercommunityin.org/PCIRegisteredReports/articles/rec?id=264>. All reviews and my responses to those comments are available at that location. This paper was given in-principle acceptance at stage 1 by Prof Simine Vazire. I would be grateful if this could be so flagged and processed without further peer review.

**Editor Final Decision:** Accept

Dec 6, 2022

Dear Leon Y. Xiao,

I am happy to say that your Stage 2 RR manuscript is now officially accepted for publication in Collabra: Psychology. Congratulations on this excellent work, I think it will make an important contribution to the literature and I look forward to seeing it published! I hope your experiences with Collabra: Psychology have been positive and that you will continue to consider it as an outlet for your work.

As there are no further reviewer revisions to make, you do not have to complete any tasks at this point.

You will be receiving separate correspondence regarding any production and technical comments, data deposits, as well as publication charges. We work with the Copyright Clearance Center to process any applicable APC charges. Please note that your APC transaction must be completed before your article gets published.

You will have an opportunity to check the page proofs before we publish your article. Thank you again for publishing in Collabra: Psychology.

Sincerely,
Simine Vazire
